# Supplementary material for: Physicochemical properties and bioactivity of polysaccharides from Isaria cicadae Miquel with different extraction processes: effects on gut microbiota and immune response in mice
Source: Royal Society of Chemistry journal article supplement (doi:10.1039/d2fo01646j), 2022-01-01
Supplement: d2fo01646j1.pdf [file d2fo01646j1.pdf]

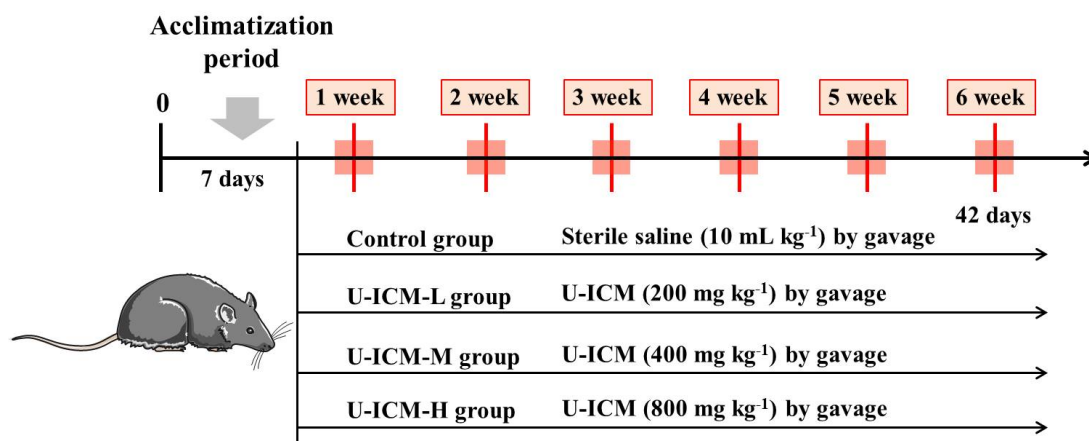

Fig. S1 Animal experiment design.

Table S1 Statistical analysis of 16S rDNA sequencing pretreatment

| Sample    | Clean_paired_reads | GC(%) | Q30(%) | num_seqs | sum_len  | min_len | avg_len | max_len |
|-----------|--------------------|-------|--------|----------|----------|---------|---------|---------|
| Control 1 | 63897              | 53%   | 96.31% | 54871    | 21798743 | 402     | 415.3   | 437     |
| Control 2 | 67581              | 52%   | 95.82% | 58996    | 23757811 | 401     | 416.2   | 443     |
| Control 3 | 59894              | 54%   | 96.72% | 49793    | 19673948 | 402     | 415.1   | 433     |
| Control 4 | 71075              | 53%   | 96.17% | 60836    | 26984473 | 402     | 416.5   | 445     |
| Control 5 | 65489              | 53%   | 96.36% | 56891    | 22964728 | 402     | 416.4   | 445     |
| Control 6 | 57931              | 54%   | 96.25% | 48226    | 18318901 | 401     | 415.1   | 432     |
| U-1CM-L 1 | 62974              | 53%   | 96.30% | 53692    | 20978153 | 402     | 415.4   | 433     |
| U-1CM-L 2 | 58413              | 53%   | 96.68% | 48842    | 19436238 | 401     | 415.3   | 433     |
| U-1CM-L 3 | 72961              | 53%   | 95.33% | 63996    | 27136188 | 402     | 417.8   | 447     |
| U-1CM-L 4 | 64908              | 54%   | 95.94% | 55783    | 21978232 | 403     | 416.1   | 437     |
| U-1CM-L 5 | 67354              | 52%   | 96.62% | 68228    | 23634462 | 402     | 415.2   | 432     |
| U-1CM-L 6 | 71984              | 53%   | 95.69% | 60942    | 26567134 | 401     | 418.4   | 447     |
| U-1CM-M 1 | 67495              | 53%   | 96.53% | 57996    | 23781382 | 401     | 417.8   | 445     |
| U-1CM-M 2 | 57932              | 53%   | 96.49% | 48908    | 18320133 | 402     | 417.9   | 445     |
| U-1CM-M 3 | 69773              | 53%   | 96.88% | 59891    | 24689341 | 402     | 415.2   | 433     |
| U-1CM-M 4 | 63892              | 53%   | 95.45% | 54916    | 21479211 | 403     | 418.6   | 447     |
| U-1CM-M 5 | 72806              | 53%   | 96.39% | 63872    | 27063483 | 402     | 418.1   | 446     |
| U-1CM-M 6 | 68849              | 53%   | 95.88% | 57056    | 23671563 | 402     | 416.3   | 432     |
| U-1CM-H 1 | 73721              | 52%   | 96.52% | 64883    | 27893723 | 401     | 417.6   | 446     |
| U-1CM-H 2 | 61743              | 53%   | 96.06% | 50937    | 20778349 | 401     | 417.4   | 445     |
| U-1CM-H 3 | 72992              | 54%   | 95.90% | 63098    | 27134216 | 403     | 416.3   | 432     |
| U-1CM-H 4 | 64197              | 53%   | 96.01% | 54198    | 22793154 | 402     | 417.9   | 445     |
| U-1CM-H 5 | 73229              | 53%   | 96.63% | 64962    | 28544932 | 402     | 416.6   | 437     |
| U-1CM-H 6 | 68482              | 53%   | 95.71% | 57438    | 23974612 | 403     | 418.2   | 447     |
